# Supplementary material
Source: Royal Society of Chemistry journal article supplement (doi:10.1039/d6ay00166a)
Supplement: d6ay00166a1.pdf [file d6ay00166a1.pdf]

## Highly sensitive SERS sensor for malachite green detection based on spiky Fe<sub>3</sub>O<sub>4</sub>@Au supraparticles

Hang Ye,<sup>a</sup> Yanke Wang,<sup>a</sup> Hufu Chen,<sup>c</sup> Tao Huang,<sup>\*ab</sup> and Shengnan Zhan<sup>\*ab</sup>

<sup>a</sup> College of Food Science and Engineering, Ningbo University, Ningbo, Zhejiang Province, 315211, China

<sup>b</sup> Zhejiang-Malaysia Joint Research Laboratory for Agricultural Product Processing and Nutrition, Ningbo University, Ningbo, Zhejiang Province, 315211, China

<sup>c</sup> Zhejiang Xiang Hai Food Co., Ltd. Ruian city, Zhejiang Province, China

\* Corresponding authors: cdhuangtao@163.com; [zhanshengnan@nbu.edu.cn](mailto:zhanshengnan@nbu.edu.cn)

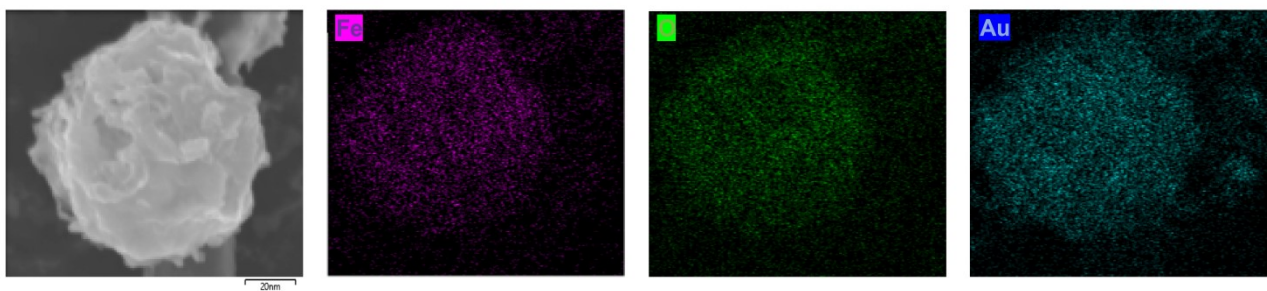

Fig.S1 The element mapping result of Fe<sub>3</sub>O<sub>4</sub>@AuSPs-1

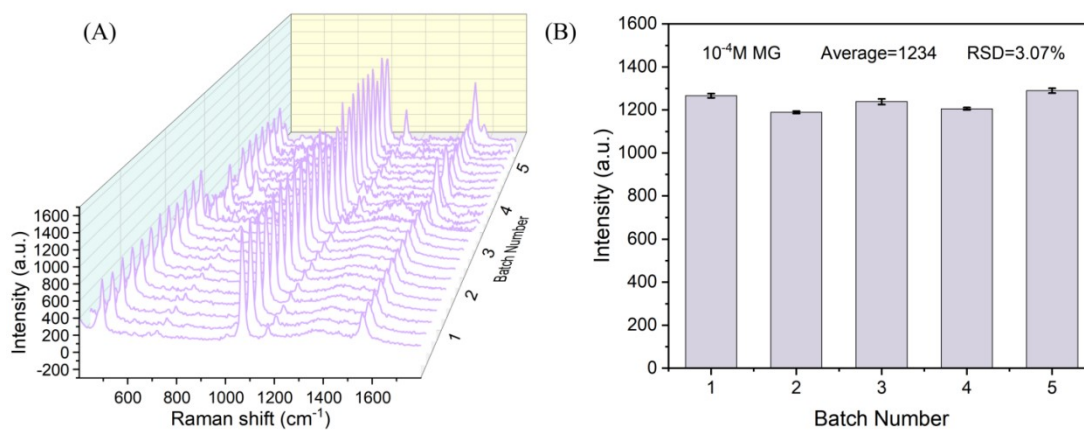

Fig. S2 The reproducibility of the spike morphologies of the Fe<sub>3</sub>O<sub>4</sub>@AuSPs with 5 batches (10<sup>-4</sup> M of MG)

**Table S1** Different SERS substrates for MG detection, LOD and linear detection range.

| SERS substrates                            | LOD (mol/L)           | Linear detection range (mol/L)         | References |
|--------------------------------------------|-----------------------|----------------------------------------|------------|
| <b>Cu MOF</b>                              | 3.2×10 <sup>-12</sup> | 4×10 <sup>-12</sup> -10 <sup>-10</sup> | [1]        |
| <b>ULGNs@Ag</b>                            | 2.5×10 <sup>-9</sup>  | 10 <sup>-8</sup> -10 <sup>-3</sup>     | [2]        |
| <b>Au@Ag NRs</b>                           | 1.58×10 <sup>-9</sup> | 5×10 <sup>-9</sup> -10 <sup>-7</sup>   | [3]        |
| <b>COF-Au NPs</b>                          | 6.2×10 <sup>-10</sup> | 10 <sup>-9</sup> -10 <sup>-5</sup>     | [4]        |
| <b>AgTNPs@SiO<sub>2</sub></b>              | 4.9×10 <sup>-13</sup> | 10 <sup>-12</sup> -10 <sup>-16</sup>   | [5]        |
| <b>Au@Si</b>                               | 7.8×10 <sup>-11</sup> | 10 <sup>-10</sup> -10 <sup>-5</sup>    | [6]        |
| <b>Fe<sub>3</sub>O<sub>4</sub>@AuSPs-1</b> | 10 <sup>-12</sup>     | 10 <sup>-12</sup> -10 <sup>-14</sup>   | This work  |

## References

- 1 S. Chen, Y. Liu, Z. Qin, G. Wen, Z. Jiang, *Analyst*, 2024, 149:1179-1189.

- 2 Y. Liu, J. Li, Q. Liu, G. Weng, J. Zhu, J. Zhao, *Colloids and Surfaces A: Physicochemical and Engineering Aspects*, 2023, 668, 131485.
- 3 X. Zhou, S. Chen, Y. Pan, Y. Wang, N. Xu, Y. Xue, X. Wei, Y. Lu, *Biosensors*, 2022, 13 (8), 766.
- 4 Y. Cheng, Y. Ding, J. Chen, W. Xu, W. Wang, S. Xu, *Spectrochimica Acta Part A: Molecular and Biomolecular Spectroscopy*, 2022, 281, 121644.
- 5 J. Zhou, J. Zhu, G. Weng, J. Li, J. Zhao, *Spectrochimica Acta Part A: Molecular and Biomolecular Spectroscopy*, 2024, 318, 124472.
- 6 Y. Liu, J. Li, G. Weng, J. Zhu, J. Zhao, *Food Chemistry* 2024, 451, 139454.
